# Supplementary material for: Effects of different Lys/Met ratios on the antioxidant capacity, tissue morphology, and fatty acid composition of subcutaneous fat in Tibetan sheep on low-protein diets: a lipidomic analysis
Source: Front Vet Sci. 2025 Jan 30;11:1528331. doi: 10.3389/fvets.2024.1528331 (PMC11824274; doi:10.3389/fvets.2024.1528331)
Supplement: Supplementary file 1 [file Table_1.xlsx]

## Sheet: LP-H|LP-M|LP-L
Lipid subclasses with VIP values > 1 and P < 0.05 and lipid molecules
name	DIFF	LipidIon	LipidGroup	Class	FattyAcid	FA1	FA2	FA3	FA4	IonFormula	CalMz	RT-(min)	QCRSD	P-value	HP-H-1	HP-H-2	HP-H-3	HP-L-1	HP-L-2	HP-L-3	HP-M-1	HP-M-2	HP-M-3	LP-H-1	LP-H-2	LP-H-3	LP-L-1	LP-L-2	LP-L-3	LP-M-1	LP-M-2	LP-M-3	MP-H-1	MP-H-2	MP-H-3	QC1	QC2	QC3	QC4	unit
POS21	Y	Cer(d14:0_17:1)+H	Cer(d31:1)+H	Cer	(d14:0_17:1)	(d14:0)	(17:1)			C31 H62 O3 N1	496.472	8.59896	0.652694	0.0468695	0.0581661	0.0424363	0.169744	0.0108348	0.0191167	0.0562308	0.0369757	0.0347139	0.0253271	0.00877123	0.0397917	0.0235851	0.035889	1.61031	0.56895	0.245177	0.477964	0.478084	0.301029	0.0908964	0.113544	0.553976	1.75336	0.53246	0.723115	ug/g
POS31	Y	Cer(d33:0)+H	Cer(d33:0)+H	Cer	(d33:0)	(d33:0)				C33 H68 O3 N1	526.519	8.38791	0.0257809	0.0127154	0.232764	0.256787	0.312516	0.246744	0.205595	0.268479	0.408305	0.238181	0.519381	0.358341	0.437384	0.383776	0.258429	0.259324	0.205762	0.190213	0.26651	0.279808	0.248026	0.34592	0.125203	0.378366	0.369266	0.391083	0.371895	ug/g
POS118	Y	Cer(m19:0_16:0)+H	Cer(m35:0)+H	Cer	(m19:0_16:0)	(m19:0)	(16:0)			C35 H72 O2 N1	538.556	12.3358	0.0948505	0.00505059	0.295554	0.392541	0.278738	0.224461	0.222395	0.136369	0.207036	0.260726	0.383712	0.140463	0.19969	0.18542	0.172978	0.152668	0.175561	0.255912	0.274057	0.267117	0.151184	0.230082	0.133238	0.186396	0.2256	0.186368	0.193017	ug/g
POS160	Y	Cer(m19:0_24:1)+H	Cer(m43:1)+H	Cer	(m19:0_24:1)	(m19:0)	(24:1)			C43 H86 O2 N1	648.665	14.8294	0.021998	0.02276	0.237284	0.31499	0.4578	0.190378	0.305605	0.283893	0.482971	0.314856	0.16491	0.342976	0.183316	0.171827	0.118082	0.201219	0.131254	0.316275	0.387544	0.370317	0.251477	0.211036	0.600575	0.220064	0.22957	0.218494	0.22233	ug/g
POS2083	Y	TG(33:0e)+NH4	TG(33:0e)+NH4	TG	(33:0e)	(33:0e)				C36 H74 O5 N1	600.556	7	0.0865548	0.0374888	0.00540422	0.00456013	0.00460475	0.00796525	0.00512221	0.00552954	0.00600889	0.0047752	0.0232664	0.0123179	0.005501	0.00780228	0.00889063	0.0123037	0.0147038	0.00482644	0.00611464	0.00481689	0.0104075	0.0143844	0.00346048	0.0123001	0.0101633	0.0119102	0.0108445	ug/g
POS184	Y	DG(14:0e)+Na	DG(14:0e)+Na	DG	(14:0e)	(14:0e)				C17 H34 O4 Na1	325.235	1.37	0.0243135	0.0238921	1.55767	2.89553	0.302745	2.08139	1.08022	2.35479	1.70782	0.738442	0.392044	1.72405	1.97728	0.824847	1.60745	2.74842	2.26428	3.38587	5.6179	3.85111	2.42243	0.927039	6.41752	2.87624	2.74749	2.89268	2.88742	ug/g
POS191	Y	DG(14:0e)+Na	DG(14:0e)+Na	DG	(14:0e)	(14:0e)				C17 H34 O4 Na1	325.235	7.218	0.594208	0.00599499	0.552369	2.56706	1.1566	3.49311	2.11434	5.26754	4.83077	1.16574	4.42753	7.51582	6.74511	4.07763	0.671259	0.748112	2.2635	4.60927	10.1281	6.30038	2.04153	4.88552	1.94196	2.25704	1.24325	3.67542	1.00407	ug/g
POS302	Y	DG(29:2e)+H	DG(29:2e)+H	DG	(29:2e)	(29:2e)				C32 H61 O4	509.456	16.3163	0.128276	0.00270698	29.3785	58.2986	103.754	248.947	26.7333	47.9331	58.9887	244.214	168.418	224.583	271.751	143.582	40.0275	50.3887	23.7239	128.171	103.351	66.5175	227.11	42.7971	382.797	136.209	128.127	171.124	147.577	ug/g
POS373	Y	DG(30:3e)+H	DG(30:3e)+H	DG	(30:3e)	(30:3e)				C33 H61 O4	521.456	13.4909	0.0378207	0.0157643	39.1365	39.4348	30.2009	41.4027	36.3004	35.7123	21.5868	35.6137	21.1182	5.21282	12.6256	21.9195	54.7399	49.6358	45.0925	54.1576	88.1275	32.9085	38.1865	133.524	13.139	50.8309	54.9078	55.1016	52.719	ug/g
POS558	Y	DG(15:0_18:2)+Na	DG(33:2)+Na	DG	(15:0_18:2)	(15:0)	(18:2)			C36 H66 O5 Na1	601.48	11.254	0.0788496	0.0152073	11.7354	22.5193	18.6981	12.0762	17.1837	13.6001	15.5624	26.5382	15.3342	19.9942	23.0014	16.6156	8.84549	15.2559	13.4543	25.487	21.8235	23.434	9.94364	25.5905	16.7205	17.7	21.0082	20.0567	18.3593	ug/g
POS562	Y	DG(33:2e)+Na	DG(33:2e)+Na	DG	(33:2e)	(33:2e)				C36 H68 O4 Na1	587.501	15.07	0.177378	0.0100276	5.59355	4.8371	8.76201	6.67667	23.9174	4.72119	3.11655	2.73147	11.0379	25.4823	29.3735	17.2959	8.61507	5.80806	6.78196	15.623	39.7399	16.8855	19.3868	39.3458	35.1653	8.63421	12.2039	8.4781	10.6029	ug/g
POS656	Y	DG(34:1e)+Na	DG(34:1e)+Na	DG	(34:1e)	(34:1e)				C37 H72 O4 Na1	603.532	17.0179	0.666615	0.0271969	5204.66	13677.3	6229.94	3324.32	1996.68	2621.13	1094.92	1410.87	9017.25	6001.7	4928.33	1917.93	1021.24	3102.9	1015.04	11804.8	22292.4	5217.28	4109.63	2415.24	3135.25	7292.45	6177.33	15899.1	3252.19	ug/g
POS683	Y	DG(34:2e)+Na	DG(34:2e)+Na	DG	(34:2e)	(34:2e)				C37 H70 O4 Na1	601.517	16.2085	0.0823604	0.00121198	44.8051	46.2811	2.57119	6.20441	6.41246	33.349	26.5126	49.6635	16.9375	43.1308	50.9517	61.6815	23.093	23.9128	15.4027	48.4289	65.1136	61.4826	4.21729	105.597	54.4315	46.784	52.4712	43.3182	49.9555	ug/g
POS684	Y	DG(12:0e_22:2)+Na	DG(34:2e)+Na	DG	(12:0e_22:2)	(12:0e)	(22:2)			C37 H70 O4 Na1	601.517	16.8272	0.0812655	0.0246757	398.169	873.684	899.376	908.645	994.851	731.823	543.494	710.353	401.078	983.308	1054.62	598.903	475.816	491.256	500.231	861.21	1058.36	723.681	842.589	943.851	984.869	513.256	533.381	614.501	536.094	ug/g
POS725	Y	DG(12:0e_22:3)+Na	DG(34:3e)+Na	DG	(12:0e_22:3)	(12:0e)	(22:3)			C37 H68 O4 Na1	599.501	16.498	0.100078	0.0134368	128.767	211.235	321.777	230.606	404.754	236.411	235.26	224.402	214.633	341.922	330.166	244.016	178.912	186.419	159.981	237.27	375.326	341.843	296.337	366.97	16.5326	150.436	190.805	182.9	178.817	ug/g
POS730	Y	DG(14:0_20:5)+H	DG(34:5)+H	DG	(14:0_20:5)	(14:0)	(20:5)			C37 H63 O5	587.467	10.2595	0.0656397	0.011401	54.0991	100.407	127.287	70.1896	74.0392	92.4616	96.3618	160.3	107.174	169.679	184.066	153.695	85.9053	135.717	94.1314	184.034	161.804	214.141	85.7449	111.325	94.6919	79.5981	89.4939	92.9269	89.6894	ug/g
POS929	Y	DG(36:4e)+H	DG(36:4e)+H	DG	(36:4e)	(36:4e)				C39 H71 O4	603.535	17.0032	0.666615	0.0271969	5204.66	13677.3	6229.94	3324.32	1996.68	2621.13	1094.92	1410.87	9017.25	6001.7	4928.33	1917.93	1021.24	3102.9	1015.04	11804.8	22292.4	5217.28	4109.63	2415.24	3135.25	7292.45	6177.33	15899.1	3252.19	ug/g
POS941	Y	DG(36:5e)+H	DG(36:5e)+H	DG	(36:5e)	(36:5e)				C39 H69 O4	601.519	17.0921	0.0670966	0.0131673	210.542	228.518	357.5	315.924	322.616	273.308	224.423	295.742	272.515	308.384	343.138	259.152	209.124	168.39	211.152	261.043	220.297	246.222	258.238	237.565	743.863	183.316	213.267	198.506	188.701	ug/g
POS946	Y	DG(36:6e)+H	DG(36:6e)+H	DG	(36:6e)	(36:6e)				C39 H67 O4	599.503	16.823	0.24996	0.0389646	28.8803	59.1289	48.0536	68.9211	63.1035	33.7423	51.8639	44.6915	30.485	69.2291	73.1443	53.9504	23.7714	7.44365	29.1762	45.0832	28.3598	57.7391	44.22	61.1942	150.922	14.7754	28.2682	23.616	23.9146	ug/g
POS975	Y	DG(38:3e)+Na	DG(38:3e)+Na	DG	(38:3e)	(38:3e)				C41 H76 O4 Na1	655.564	9.75239	0.111273	0.025198	12.072	14.566	18.6473	19.0511	16.8119	12.2931	16.9989	14.4165	13.6894	12.007	11.9352	14.0184	13.8872	15.7305	16.4789	9.37909	9.7332	12.7426	10.1371	12.6234	17.5986	11.934	10.8384	13.1115	10.1933	ug/g
POS1025	Y	DG(40:6e)+H	DG(40:6e)+H	DG	(40:6e)	(40:6e)				C43 H75 O4	655.566	9.78034	0.111273	0.025198	12.072	14.566	18.6473	19.0511	16.8119	12.6252	16.9989	14.4165	13.6894	12.007	11.9352	14.0184	13.8872	15.7305	16.4789	9.37909	9.7332	12.7426	10.1371	12.6234	19.9931	11.934	10.8384	13.1115	10.1933	ug/g
POS1031	Y	DG(42:6)+Na	DG(42:6)+Na	DG	(42:6)	(42:6)				C45 H76 O5 Na1	719.558	14.9624	0.186265	0.0402099	39.5727	59.2728	66.4317	50.1117	51.9229	41.1429	60.6144	51.3335	34.8531	37.0693	21.108	27.675	32.5669	34.8041	36.5287	42.1086	63.3696	45.1462	22.652	26.0209	57.3176	17.3825	25.9682	27.2538	25.2202	ug/g
POS1139	Y	LPG(11:0)+NH4	LPG(11:0)+NH4	LPG	(11:0)	(11:0)				C17 H39 O9 N1 P1	432.236	1.759	0.986704	0.0119282	29.1414	841.952	26.5617	56.4823	41	28.5967	32.2145	49.7108	38.9957	39.8738	37.9005	47.3156	25.5244	38.1758	28.1848	49.6799	59.9737	49.2918	48.7138	21.7044	130.913	74.8509	847.194	55.2356	691.406	ug/g
POS1144	Y	LPG(35:0)+Na	LPG(35:0)+Na	LPG	(35:0)	(35:0)				C41 H83 O9 N0 P1 Na1	773.567	12.87	0.38104	0.0202901	1.17231	4.33745	0.699054	4.16033	1.63284	1.71039	1.92834	2.85956	3.79028	3.16146	2.67813	2.61543	1.11178	2.3364	1.89184	3.74284	3.30645	3.69179	2.54769	1.58521	3.91237	2.52667	3.68752	2.73462	5.55461	ug/g
POS1146	Y	LPG(36:0)+Na	LPG(36:0)+Na	LPG	(36:0)	(36:0)				C42 H85 O9 N0 P1 Na1	787.582	13.562	0.249529	0.00570471	0.583844	0.845441	0.450434	2.06307	1.56069	0.560522	2.11943	1.92616	1.70903	1.52169	1.39212	2.26172	0.43344	1.05741	0.649852	2.27161	2.29191	2.25625	1.99462	0.0769641	48.7277	6.43948	8.63346	6.78849	10.8917	ug/g
POS1148	Y	LPG(37:1)+Na	LPG(37:1)+Na	LPG	(37:1)	(37:1)				C43 H85 O9 N0 P1 Na1	799.582	14.2822	0.057398	0.0221425	3.79983	3.94704	3.79071	5.21839	2.83823	4.4885	2.69526	6.12256	4.3252	8.62854	6.00701	7.01523	2.1465	4.99324	2.43576	6.06188	5.5588	5.47228	4.71924	4.12055	13.3417	4.44624	5.02059	4.53953	4.86905	ug/g
POS1299	Y	PC(18:3)+H	PC(18:3)+H	PC	(18:3)	(18:3)				C26 H47 O8 N1 P1	532.303	2.18746	0.162534	0.00358308	0.136653	0.11744	0.223812	0.138841	0.306747	0.26864	0.258213	0.274626	0.244074	0.34506	0.607197	0.366749	0.194938	0.17173	0.135957	0.195476	0.195873	0.217597	0.225362	0.196943	0.180589	0.383431	0.477532	0.321434	0.411737	ug/g
POS1531	Y	PE(10:0_11:3)+H	PE(21:3)+H	PE	(10:0_11:3)	(10:0)	(11:3)			C26 H47 O8 N1 P1	532.303	2.11665	0.0713484	0.00288794	0.150846	0.285602	0.24967	0.080768	0.421075	0.350968	0.197055	0.330863	0.157434	0.308101	0.54632	0.473493	0.235443	0.291968	0.10881	1.2856	1.05057	1.00554	1.34119	0.961863	0.843632	2.15509	2.55865	2.44365	2.37002	ug/g
POS1302	Y	PC(21:4)+H	PC(21:4)+H	PC	(21:4)	(21:4)				C29 H51 O8 N1 P1	572.335	1.71599	0.0675145	0.0408506	0.0801036	0.0451968	0.0530287	0.17666	0.21597	0.0878301	0.14186	0.125396	0.116719	0.106672	0.120816	0.139021	0.069707	0.0761963	0.0398073	0.0621794	0.100058	0.0652446	0.0921247	0.129733	0.13809	0.223669	0.238674	0.203784	0.232178	ug/g
POS1315	Y	PC(31:0e)+H	PC(31:0e)+H	PC	(31:0e)	(31:0e)				C39 H81 O7 N1 P1	706.575	9.95	0.107231	0.0272729	0.131369	0.109557	0.151545	0.231015	0.154748	0.154076	0.118691	0.0882096	0.113391	0.055774	0.0705323	0.0788717	0.12704	0.0893797	0.173106	0.191402	0.148678	0.110803	0.0955868	0.250385	0.00498064	0.127097	0.158286	0.128907	0.131786	ug/g
POS1566	Y	PE(18:1p_17:1)+H	PE(35:2p)+H	PE	(18:1p_17:1)	(18:1p)	(17:1)			C40 H77 O7 N1 P1	714.543	10.708	0.109095	0.0112756	3.20037	2.34804	2.33532	1.51884	2.37877	1.81798	1.54757	1.55412	0.987149	1.2604	1.50496	1.37513	2.07822	2.28751	1.7249	1.53767	1.21111	1.37799	0.932315	2.12762	4.07422	1.71048	2.03219	1.57003	1.78482	ug/g
POS1602	Y	PE(18:0_19:0)+Na	PE(37:0)+Na	PE	(18:0_19:0)	(18:0)	(19:0)			C42 H84 O8 N1 P1 Na1	784.583	11.6369	0.0554907	0.0220976	1.44403	0.510114	0.471026	0.947004	0.779136	0.753799	0.513292	1.05867	0.521187	0.435387	0.190662	0.315428	0.643893	0.764713	0.916523	0.490365	0.566295	0.351799	0.455479	0.355348	7.55306	0.657634	0.673087	0.598924	0.613293	ug/g
POS1639	Y	PE(39:2e)+Na	PE(39:2e)+Na	PE	(39:2e)	(39:2e)				C44 H86 O7 N1 P1 Na1	794.603	10.36	0.370938	0.00579364	0.914571	0.248535	0.182475	1.93878	0.797373	0.557233	0.588636	0.86573	0.751294	0.20977	0.205175	0.31521	0.651275	0.482515	0.602125	0.424284	0.381046	0.282623	0.575103	0.0628741	0.875919	0.403483	0.766098	0.352496	0.47245	ug/g
POS1523	Y	PE(6:0_13:0)+Na	PE(19:0)+Na	PE	(6:0_13:0)	(6:0)	(13:0)			C24 H48 O8 N1 P1 Na1	532.301	2.18269	0.200645	0.0118929	0.691298	0.590154	1.12997	0.71551	1.49723	1.39742	1.12079	1.38351	1.13081	1.64055	2.97122	1.88614	1.02584	0.90684	0.526876	1.11103	0.96542	0.978757	1.1306	0.92937	0.790123	1.96968	2.72921	1.71441	2.20568	ug/g
POS1524	Y	PE(8:0_11:1)+Na	PE(19:1)+Na	PE	(8:0_11:1)	(8:0)	(11:1)			C24 H46 O8 N1 P1 Na1	530.285	1.79666	0.0750416	0.0171674	1.82556	1.99452	2.06698	3.68429	4.77526	3.18769	2.8014	3.68064	2.48272	3.2428	4.71501	4.23524	2.10565	1.81232	0.997099	2.49355	2.59575	1.78034	3.00968	2.56571	2.54712	5.17791	6.21115	5.77009	5.60646	ug/g
POS1681	Y	PG(31:0)+NH4	PG(31:0)+NH4	PG	(31:0)	(31:0)				C37 H77 O10 N1 P1	726.528	7.073	0.0450681	0.0474941	0.220975	0.632302	0.184295	0.57385	0.475774	0.26604	0.321418	0.641744	0.363331	0.440966	0.390861	0.557884	0.146602	0.354655	0.220711	0.465601	0.510098	0.349941	0.560016	0.228629	0.924741	0.880298	0.841192	0.790652	0.856785	ug/g
POS1688	Y	PG(16:0_16:0)+NH4	PG(32:0)+NH4	PG	(16:0_16:0)	(16:0)	(16:0)			C38 H79 O10 N1 P1	740.544	7.06615	0.0906798	0.0487022	1.00331	2.39569	0.847595	1.68232	1.43744	0.971562	1.21877	2.18595	1.38284	1.41167	1.43965	1.94463	0.653594	1.35527	0.808364	1.47214	1.62341	1.48888	1.48435	0.95496	3.9976	2.6803	2.23919	2.56328	2.77159	ug/g
POS1691	Y	PG(18:0_15:0)+NH4	PG(33:0)+NH4	PG	(18:0_15:0)	(18:0)	(15:0)			C39 H81 O10 N1 P1	754.559	7.05298	0.0978316	0.0228886	0.930419	2.02746	0.84947	1.59086	1.37481	0.943876	1.13321	1.59622	1.25964	1.24605	1.41407	1.95453	0.619031	1.09411	0.731502	1.3245	1.50048	1.31165	1.56553	0.882441	3.69222	2.2526	2.00204	2.22957	2.54052	ug/g
POS1710	Y	PG(28:0_16:0)+H	PG(44:0)+H	PG	(28:0_16:0)	(28:0)	(16:0)			C50 H100 O10 N0 P1	891.705	14.4164	0.0829089	0.0362075	6.28618	13.5737	8.09047	21.9954	31.796	11.1066	8.25008	24.3637	13.9566	26.4028	37.249	29.3937	13.5175	17.3817	7.81283	22.519	10.4534	13.4479	28.6817	24.1249	40.8977	23.9625	28.7872	26.0536	28.2927	ug/g
POS1779	Y	PI(36:2e)+Na	PI(36:2e)+Na	PI	(36:2e)	(36:2e)				C45 H85 O12 N0 P1 Na1	871.567	13.382	0.269976	0.00543432	0.39593	22.6308	3.12641	3.69011	1.34598	1.26049	3.36308	31.675	2.13906	2.21675	5.18727	6.07597	1.76655	1.66822	1.81733	7.56872	6.57326	6.42891	4.36562	0.680947	8.41888	17.0506	23.7994	20.4755	31.7299	ug/g
POS1785	Y	PI(38:5e)+H	PI(38:5e)+H	PI	(38:5e)	(38:5e)				C47 H84 O12 N0 P1	871.569	12.9861	0.290759	0.0160103	3.31271	56.5098	3.17991	14.9803	9.21166	1.33411	16.9058	117.883	8.74553	11.5402	5.1625	18.9911	9.70594	7.7301	5.68348	31.6672	35.1043	24.8989	18.7549	1.01011	2.46212	55.8937	68.438	65.8222	104.895	ug/g
POS1892	Y	SM(t42:2)+H	SM(t42:2)+H	SM	(t42:2)	(t42:2)				C47 H94 O7 N2 P1	829.679	11.332	0.874016	0.0181384	0.0830685	0.0540622	0.0525521	0.0124495	0.0272031	0.0468461	0.0110361	0.0391612	0.0216115	0.0531052	0.0547474	0.0545264	0.0349267	0.0242011	0.0150125	0.0409213	0.0400854	0.0336529	0.0409717	0.0405957	0.0072655	0.0110305	0.00326011	0.0287664	0.0079472	ug/g
POS1936	Y	SPH(d17:0)+H	SPH(d17:0)+H	SPH	(d17:0)	(d17:0)				C17 H38 O2 N1	288.29	1.36623	0.0636316	3.72614e-07	58.1363	54.746	51.3083	51.0055	44.8085	41.9021	38.6825	53.4997	41.6758	50.6691	55.5528	50.6471	3.88571	4.25033	3.33565	4.64507	5.50417	3.92986	50.929	53.4356	48.1964	55.8685	64.1331	57.5395	56.9982	ug/g
POS1942	Y	SPH(d18:2)+H	SPH(d18:2)+H	SPH	(d18:2)	(d18:2)				C18 H36 O2 N1	298.274	6.229	0.544044	0.0428436	0.414302	0.129211	0.870768	0.196381	0.212657	0.204534	0.374989	0.250849	0.63718	0.225287	0.437141	0.781833	0.107741	0.203007	0.110396	0.255041	0.401424	0.526881	0.0887982	0.648757	0.724003	0.618908	0.296379	0.969161	0.361238	ug/g
POS1944	Y	SPH(d19:0)+H	SPH(d19:0)+H	SPH	(d19:0)	(d19:0)				C19 H42 O2 N1	316.321	1.71465	0.075047	4.31482e-07	23.2054	22.0206	23.0566	24.3768	17.7865	20.0967	16.6048	24.8159	16.2269	21.3761	23.8963	23.8336	1.29673	1.29472	1.02048	1.62727	1.89199	1.28643	22.7611	21.2362	21.6867	21.3652	25.4965	22.5936	22.9814	ug/g
POS1967	Y	SPH(t17:0)+H	SPH(t17:0)+H	SPH	(t17:0)	(t17:0)				C17 H38 O3 N1	304.285	1.45288	0.0781027	4.02608e-05	5.11169	3.89314	5.30256	5.57205	4.3119	4.42392	2.77277	4.47368	2.26976	4.59874	5.08767	5.66827	0.113554	0.11759	0.044131	0.11658	0.23528	0.0982775	5.15881	4.81908	6.39411	4.70803	5.54373	4.73089	5.09714	ug/g
POS5116	Y	ZyE(35:6)+NH4	ZyE(35:6)+NH4	ZyE	(35:6)	(35:6)				C62 H104 O2 N1	894.806	14.4796	0.311104	0.0147891	3.6828	3.37445	3.23303	2.72052	3.47681	4.19587	2.06457	3.63021	2.99181	2.13117	2.04904	1.35946	2.94632	4.74135	2.87629	3.66691	4.63432	3.48735	1.62649	5.18458	0.456907	1.63562	3.66034	3.24045	3.54176	ug/g
POS2080	Y	TG(12:0_10:2_10:2)+NH4	TG(32:4)+NH4	TG	(12:0_10:2_10:2)	(12:0)	(10:2)	(10:2)		C35 H62 O6 N1	592.457	9.82356	0.371237	0.0440481	0.016233	0.00855594	0.0128267	0.00957222	0.0126999	0.0132908	0.0120601	0.0107065	0.013113	0.0134833	0.0137914	0.0118773	0.0139266	0.0117206	0.01216	0.0104838	0.00820396	0.0109644	0.00969434	0.0145669	0.0193325	0.00703868	0.0194086	0.0174395	0.0188457	ug/g
POS2130	Y	TG(6:0_10:0_18:1)+NH4	TG(34:1)+NH4	TG	(6:0_10:0_18:1)	(6:0)	(10:0)	(18:1)		C37 H72 O6 N1	626.535	11.7666	0.180006	0.0311933	0.0156875	0.0127835	0.0187412	0.00566307	0.012426	0.0107843	0.00776724	0.0102035	0.0176644	0.00138739	0.00378233	0.0092726	0.0118128	0.0178139	0.0233262	0.00138029	0.00203838	0.0050064	0.00223358	0.0213844	0.00801578	0.00234593	0.00191796	0.00149597	0.00197751	ug/g
POS2192	Y	TG(4:0_16:0_16:0)+NH4	TG(36:0)+NH4	TG	(4:0_16:0_16:0)	(4:0)	(16:0)	(16:0)		C39 H78 O6 N1	656.582	12.5547	0.275787	0.0136816	0.1664	0.0603975	0.0492618	0.0627605	0.109442	0.169758	0.0415761	0.0821396	0.162134	0.126747	0.129513	0.0873838	0.0736225	0.132899	0.159503	0.0605571	0.0311369	0.0359009	0.0563025	0.150186	0.0023058	0.0746058	0.11936	0.0680926	0.076953	ug/g
POS2197	Y	TG(10:0_12:0_14:0)+NH4	TG(36:0)+NH4	TG	(10:0_12:0_14:0)	(10:0)	(12:0)	(14:0)		C39 H78 O6 N1	656.582	13.9589	0.0390919	0.000339319	1.01431	0.816225	0.406242	0.702049	0.554368	0.595811	0.452584	0.59775	0.726242	0.290271	0.263704	0.350114	0.587617	0.661582	0.610713	0.329132	0.304042	0.371398	0.19311	0.423244	0.633178	0.662248	0.657931	0.608567	0.631423	ug/g
POS2216	Y	TG(16:0_9:0_11:2)+NH4	TG(36:2)+NH4	TG	(16:0_9:0_11:2)	(16:0)	(9:0)	(11:2)		C39 H74 O6 N1	652.551	11.068	0.412753	0.0463527	0.0102059	0.00729049	0.0143185	0.011129	0.0145391	0.0102346	0.00979325	0.00925978	0.0135869	0.0154983	0.0193313	0.0156869	0.00934368	0.00910425	0.0116546	0.0117666	0.00517554	0.00968288	0.00675261	0.00230445	0.000776785	0.00352498	0.011486	0.0103203	0.0111781	ug/g
POS2262	Y	TG(10:0_10:0_18:1)+NH4	TG(38:1)+NH4	TG	(10:0_10:0_18:1)	(10:0)	(10:0)	(18:1)		C41 H80 O6 N1	682.598	12.7989	0.177494	0.0229167	0.2375	0.122627	0.12951	0.157232	0.207389	0.131053	0.130583	0.146898	0.199908	0.136109	0.114018	0.149445	0.154197	0.212057	0.159435	0.0970837	0.0870632	0.125107	0.0694124	0.209259	0.0560715	0.126905	0.192882	0.181089	0.187791	ug/g
POS2264	Y	TG(10:0_10:0_18:1)+NH4	TG(38:1)+NH4	TG	(10:0_10:0_18:1)	(10:0)	(10:0)	(18:1)		C41 H80 O6 N1	682.598	13.6627	0.0253282	0.0209507	0.567699	0.444146	0.456539	0.719385	0.694474	0.442778	0.720658	0.469694	0.902913	0.746618	0.682329	0.727325	0.804997	1.20281	0.988519	0.668723	0.628971	0.462512	0.409882	0.989287	0.0603214	0.818042	0.804436	0.776266	0.779351	ug/g
POS2265	Y	TG(4:0_16:0_18:1)+NH4	TG(38:1)+NH4	TG	(4:0_16:0_18:1)	(4:0)	(16:0)	(18:1)		C41 H80 O6 N1	682.598	13.9952	0.0383436	0.0208351	2.14916	2.0418	1.098	2.1359	2.07725	1.42645	1.00431	1.25465	1.68407	0.733892	0.601219	1.03021	1.19925	1.56021	1.32691	0.889989	0.81551	0.962279	0.642295	1.29314	0.479252	1.54119	1.48421	1.42911	1.41922	ug/g
POS2270	Y	TG(10:0_10:0_18:2)+NH4	TG(38:2)+NH4	TG	(10:0_10:0_18:2)	(10:0)	(10:0)	(18:2)		C41 H78 O6 N1	680.582	12.9401	0.31269	0.0479405	0.22498	0.185176	0.121315	0.241346	0.057255	0.262034	0.163344	0.123476	0.262675	0.187075	0.120864	0.138504	0.236212	0.320731	0.206821	0.154153	0.178117	0.211314	0.119549	0.376224	0.0522403	0.172759	0.174063	0.0797595	0.174231	ug/g
POS2326	Y	TG(16:0_6:0_18:1)+NH4	TG(40:1)+NH4	TG	(16:0_6:0_18:1)	(16:0)	(6:0)	(18:1)		C43 H84 O6 N1	710.629	13.6792	0.177508	0.0355903	0.790656	0.527244	0.502879	0.686772	0.841336	0.559835	0.54726	0.54964	0.79223	0.576129	0.469877	0.652565	0.626818	0.828933	0.695821	0.482881	0.46573	0.529422	0.339385	0.743923	0.101463	0.511235	0.777904	0.723552	0.757472	ug/g
POS2351	Y	TG(15:0_13:0_13:0)+NH4	TG(41:0)+NH4	TG	(15:0_13:0_13:0)	(15:0)	(13:0)	(13:0)		C44 H88 O6 N1	726.661	13.7177	0.178299	0.037062	0.0569788	0.0662006	0.0127757	0.0372698	0.016323	0.0539555	0.00709181	0.0489923	0.0236861	0.0292388	0.0152255	0.0166344	0.0395148	0.07913	0.0673956	0.0172769	0.0285539	0.0449176	0.0352418	0.0594845	0.0228785	0.04946	0.0610553	0.0542335	0.0739495	ug/g
POS2415	Y	TG(10:0_14:0_18:1)+NH4	TG(42:1)+NH4	TG	(10:0_14:0_18:1)	(10:0)	(14:0)	(18:1)		C45 H88 O6 N1	738.661	15.3719	0.130547	0.00147803	28.0144	30.2785	24.0116	33.0034	23.2472	25.4054	27.1959	19.2065	40.0113	32.6331	32.4869	31.2823	31.9674	27.7358	32.9552	24.682	22.8476	22.1881	20.4868	35.3469	30.5452	36.0171	37.511	27.5568	35.2153	ug/g
POS2418	Y	TG(10:0_14:0_18:1)+NH4	TG(42:1)+NH4	TG	(10:0_14:0_18:1)	(10:0)	(14:0)	(18:1)		C45 H88 O6 N1	738.661	16.915	0.323959	0.0428458	18.3177	0.0662938	20.0369	0.077592	30.4556	21.6514	22.2438	0.333704	0.0202955	0.302736	0.0191175	0.19547	27.7167	43.1744	24.4144	0.240124	0.0321342	23.8529	32.0997	30.2067	30.4137	0.323329	0.140797	0.324195	0.287731	ug/g
POS2452	Y	TG(15:0_14:0_14:0)+NH4	TG(43:0)+NH4	TG	(15:0_14:0_14:0)	(15:0)	(14:0)	(14:0)		C46 H92 O6 N1	754.692	16.5983	0.292295	0.0393816	0.551537	0.294989	0.00810816	0.148916	0.039163	0.126429	0.17542	0.324563	2.29365	0.575914	0.261107	0.231713	0.17516	0.0591721	0.0390671	0.149958	0.113212	0.137559	0.029912	0.0901986	1.47492	0.67971	0.400383	0.365056	0.480902	ug/g
POS2561	Y	TG(16:1_10:0_18:1)+NH4	TG(44:2)+NH4	TG	(16:1_10:0_18:1)	(16:1)	(10:0)	(18:1)		C47 H90 O6 N1	764.676	15.4507	0.0975204	0.0336906	18.1404	19.5951	17.666	22.9341	20.1949	14.6069	17.4569	19.4636	21.1989	22.5365	19.428	24.9618	16.2608	16.9202	17.0311	23.0275	20.9902	18.1735	14.2845	22.2605	18.8356	19.9044	25.1094	21.6062	22.2711	ug/g
POS2622	Y	TG(10:0_17:1_18:1)+NH4	TG(45:2)+NH4	TG	(10:0_17:1_18:1)	(10:0)	(17:1)	(18:1)		C48 H92 O6 N1	778.692	15.7003	0.014369	0.00711105	5.16935	3.8208	3.8625	3.94287	4.86994	4.08142	6.20587	4.39552	4.54695	4.21783	4.13808	4.75571	3.61876	3.911	3.46498	4.47675	4.61912	4.60889	3.251	5.37512	4.07831	4.73169	4.86378	4.72923	4.72086	ug/g
POS2710	Y	TG(18:1_14:0_14:0)+Na	TG(46:1)+Na	TG	(18:1_14:0_14:0)	(18:1)	(14:0)	(14:0)		C49 H92 O6 Na1	799.679	4.83956	0.180211	0.0416804	0.00770337	0.00632901	0.00903765	0.0057024	0.00111981	0.00198442	0.00566861	0.00399439	0.0118871	0.0028862	0.00160894	0.00191433	0.0127826	0.0100316	0.00591799	0.0104568	0.00296454	0.00241399	0.00916546	0.00476895	0.00292344	0.00350472	0.00337788	0.00334968	0.00229048	ug/g
POS2773	Y	TG(18:1_14:0_14:3)+NH4	TG(46:4)+NH4	TG	(18:1_14:0_14:3)	(18:1)	(14:0)	(14:3)		C49 H90 O6 N1	788.676	15.48	0.32571	0.0113252	0.399897	0.356562	0.569601	0.377747	0.405379	0.631453	0.615081	0.41099	0.629469	0.885306	0.78265	0.797504	0.328244	0.243431	0.295729	0.794336	0.334616	0.390338	0.53511	0.341307	0.157282	0.597777	0.794608	0.33272	0.607656	ug/g
POS2774	Y	TG(18:2e_10:1_18:1)+H	TG(46:4e)+H	TG	(18:2e_10:1_18:1)	(18:2e)	(10:1)	(18:1)		C49 H89 O5	757.67	13.59	0.042244	0.0245401	0.0198785	0.0265399	0.0222357	0.0268677	0.0109863	0.0259586	0.0171045	0.0225647	0.0147298	0.0150357	0.0217449	0.0108686	0.0437294	0.0433926	0.025387	0.022337	0.0221481	0.0171015	0.015776	0.0277208	0.00408017	0.0438362	0.0399496	0.0405709	0.0423309	ug/g
POS2861	Y	TG(11:0_18:1_18:1)+NH4	TG(47:2)+NH4	TG	(11:0_18:1_18:1)	(11:0)	(18:1)	(18:1)		C50 H96 O6 N1	806.723	16.1861	0.0297199	3.19217e-05	15.0472	13.1567	13.5369	10.8482	12.3582	12.5304	14.9459	13.803	13.9281	13.642	13.9791	13.9072	11.6816	11.7209	11.5713	14.5794	14.4423	13.7644	10.5138	15.6256	13.7616	13.482	14.4677	13.9773	14.1944	ug/g
POS2876	Y	TG(16:0_11:4_20:4)+Na	TG(47:8)+Na	TG	(16:0_11:4_20:4)	(16:0)	(11:4)	(20:4)		C50 H80 O6 Na1	799.585	14.2981	0.0369366	0.0107432	0.0428892	0.0233407	0.0498393	0.0425561	0.0263016	0.0386687	0.0243403	0.0388999	0.0520785	0.0738045	0.046612	0.0559877	0.0309893	0.0335249	0.0278941	0.0429429	0.0319333	0.0408849	0.0357809	0.0506403	0.042369	0.0428365	0.0411657	0.0404067	0.0392307	ug/g
POS3020	Y	TG(16:1_14:0_18:1)+NH4	TG(48:2)+NH4	TG	(16:1_14:0_18:1)	(16:1)	(14:0)	(18:1)		C51 H98 O6 N1	820.739	16.3982	0.075117	0.0390711	155.594	145.268	153.57	157.069	167.028	144.025	142.816	137.79	174.895	188.739	171.581	180.539	166.451	141.785	158.588	160.674	162.661	162.006	148.405	176.073	181.469	187.596	186.941	168.162	202.305	ug/g
POS3043	Y	TG(16:0_14:3_18:1)+NH4	TG(48:4)+NH4	TG	(16:0_14:3_18:1)	(16:0)	(14:3)	(18:1)		C51 H94 O6 N1	816.708	15.6069	0.042682	0.0352744	4.31882	3.00447	3.30995	2.69006	5.17502	3.28612	3.33844	3.30983	3.4962	4.10723	3.63345	5.11416	3.24791	3.31389	2.45746	4.09734	4.12995	4.58075	3.427	6.57086	4.19554	4.26365	4.38697	4.00907	4.05208	ug/g
POS3121	Y	TG(18:4_11:2_20:5)+H	TG(49:11)+H	TG	(18:4_11:2_20:5)	(18:4)	(11:2)	(20:5)		C52 H79 O6	799.587	14.278	0.0369366	0.0107432	0.0428892	0.0233407	0.0498393	0.0425561	0.0263016	0.0386687	0.0243403	0.0388999	0.0520785	0.0738045	0.046612	0.0559877	0.0309893	0.0335249	0.0278941	0.0429429	0.0319333	0.0408849	0.0357809	0.0506403	0.036076	0.0428365	0.0411657	0.0404067	0.0392307	ug/g
POS3131	Y	TG(14:0_17:1_18:2)+NH4	TG(49:3)+NH4	TG	(14:0_17:1_18:2)	(14:0)	(17:1)	(18:2)		C52 H98 O6 N1	832.739	16.2848	0.0223058	0.00048255	8.99326	1.13665	9.0755	8.29758	9.44784	8.62515	10.0083	10.3312	10.5898	10.1166	9.05043	10.4597	7.42415	7.31381	7.35385	9.58086	9.42648	10.0193	7.71807	10.8467	9.49636	9.55938	9.18688	9.13421	9.12878	ug/g
POS3152	Y	TG(18:1_11:3_20:5)+Na	TG(49:9)+Na	TG	(18:1_11:3_20:5)	(18:1)	(11:3)	(20:5)		C52 H82 O6 Na1	825.6	14.306	0.0344793	0.0011741	0.0226396	0.0208429	0.0295513	0.0373508	0.0245971	0.0205169	0.0160334	0.0216737	0.0318102	0.0367755	0.0302492	0.0367506	0.0206083	0.0181587	0.0163903	0.0257379	0.0257335	0.0217092	0.0265509	0.031674	0.0278532	0.0287431	0.0280971	0.0273717	0.0265248	ug/g
POS3327	Y	TG(18:0_14:0_18:3)+NH4	TG(50:3)+NH4	TG	(18:0_14:0_18:3)	(18:0)	(14:0)	(18:3)		C53 H100 O6 N1	846.755	16.4406	0.0202223	0.0114694	128.367	117.16	139.828	141.338	161.663	125.77	122.311	120.693	131.154	166.29	146.316	162.862	134.057	120.178	129.598	142.422	128.316	136.685	133.243	156.513	152.284	153.312	149.841	145.931	149.215	ug/g
POS3356	Y	TG(18:1_14:0_18:3)+NH4	TG(50:4)+NH4	TG	(18:1_14:0_18:3)	(18:1)	(14:0)	(18:3)		C53 H98 O6 N1	844.739	16.0994	0.100285	0.0241193	18.0852	15.9574	19.9697	17.5752	27.0284	19.6179	16.4823	17.9202	17.1181	30.2238	19.5995	32.5042	17.1578	15.9497	15.101	22.0855	20.4257	21.6712	19.0133	28.7317	23.0529	20.597	25.14	20.6541	23.6333	ug/g
POS3371	Y	TG(14:0_18:2_18:3)+NH4	TG(50:5)+NH4	TG	(14:0_18:2_18:3)	(14:0)	(18:2)	(18:3)		C53 H96 O6 N1	842.723	15.7012	0.0271826	0.00927346	2.04158	1.47004	2.10629	1.59155	3.08177	1.71412	1.93606	1.99535	1.76479	2.23471	2.07488	3.08656	1.59643	1.4863	1.25584	2.33049	2.1062	2.2204	1.7561	3.63302	1.19127	2.24998	2.36477	2.22891	2.31648	ug/g
POS3372	Y	TG(18:1_14:3_18:1)+NH4	TG(50:5)+NH4	TG	(18:1_14:3_18:1)	(18:1)	(14:3)	(18:1)		C53 H96 O6 N1	842.723	16.3419	0.0664049	0.0466861	0.28255	0.315539	0.624669	0.293578	0.344059	0.320142	0.378593	0.475065	0.635539	0.494344	0.590894	0.632138	0.430857	0.19616	0.233318	0.416588	0.269756	0.233287	0.330273	0.613947	1.1796	0.729016	0.70159	0.629777	0.653397	ug/g
POS3421	Y	TG(16:0_17:0_18:1)+H	TG(51:1)+H	TG	(16:0_17:0_18:1)	(16:0)	(17:0)	(18:1)		C54 H103 O6	847.775	16.4344	0.0453905	0.0459712	19.7346	16.2164	20.9654	21.8174	23.7129	19.16	17.8582	17.7786	20.7041	24.338	23.5081	22.696	21.1974	16.7056	20.2996	20.4235	20.18	20.5021	19.6312	24.3973	22.8814	21.7087	23.1854	21.7336	23.7254	ug/g
POS3441	Y	TG(18:1_11:4_22:6)+H	TG(51:11)+H	TG	(18:1_11:4_22:6)	(18:1)	(11:4)	(22:6)		C54 H83 O6	827.618	14.03	0.283312	0.0242863	0.00645541	0.0176586	0.00951983	0.01247	0.0265647	0.00830722	0.0153481	0.00626886	0.0258861	0.0231581	0.0279764	0.021873	0.0161298	0.0192101	0.0236533	0.00193492	0.00285575	0.0135018	0.0189572	0.0149474	0.0156551	0.0160661	0.0327667	0.0230363	0.0265582	ug/g
POS3444	Y	TG(20:5_11:2_20:5)+H	TG(51:12)+H	TG	(20:5_11:2_20:5)	(20:5)	(11:2)	(20:5)		C54 H81 O6	825.603	14.3247	0.0344793	0.000965555	0.0226396	0.020847	0.0295513	0.0373508	0.0245941	0.0212805	0.0160334	0.0216737	0.0318102	0.0367755	0.0302492	0.0367506	0.0206083	0.0183844	0.0163903	0.0257379	0.0257335	0.0223243	0.0251015	0.031674	0.0278532	0.0287431	0.0280971	0.0273717	0.0265248	ug/g
POS3462	Y	TG(15:0_18:1_18:2)+NH4	TG(51:3)+NH4	TG	(15:0_18:1_18:2)	(15:0)	(18:1)	(18:2)		C54 H102 O6 N1	860.77	16.5991	0.0133061	0.00821844	22.0727	22.0806	22.8867	24.113	29.0226	20.6996	24.5136	23.1184	22.7613	25.2362	22.2442	24.0485	18.6023	18.835	20.0288	22.5773	20.8743	23.6172	22.7088	23.2304	25.7807	22.1584	22.8802	22.4308	22.4306	ug/g
POS3469	Y	TG(15:0_18:1_18:3)+NH4	TG(51:4)+NH4	TG	(15:0_18:1_18:3)	(15:0)	(18:1)	(18:3)		C54 H100 O6 N1	858.755	16.2905	0.0287212	0.0462427	3.52132	2.92614	4.80063	4.63419	6.91191	4.54939	5.56996	5.06799	4.26347	5.04787	4.95883	5.94726	3.0159	3.47208	3.82509	4.88462	3.44716	5.47358	4.2942	6.45589	5.28716	4.95301	5.03836	4.71676	4.97965	ug/g
POS3471	Y	TG(16:0_14:4_21:1)+NH4	TG(51:5)+NH4	TG	(16:0_14:4_21:1)	(16:0)	(14:4)	(21:1)		C54 H98 O6 N1	856.739	8.844	0.282301	0.0147797	0.102787	0.0402058	0.121517	0.0762786	0.0645612	0.179076	0.0947828	0.0301724	0.220693	0.0379867	0.10166	0.0712667	0.200321	0.155798	0.35396	0.0534632	0.0345016	0.0783319	0.0507248	0.143862	0.0643296	0.0701907	0.0631253	0.0815318	0.0391314	ug/g
POS3475	Y	TG(20:2_11:2_20:2)+Na	TG(51:6)+Na	TG	(20:2_11:2_20:2)	(20:2)	(11:2)	(20:2)		C54 H92 O6 Na1	859.679	15.1597	0.170106	0.00165411	0.362589	0.170955	0.284177	0.172862	0.397982	0.418701	0.230828	0.193004	0.267217	0.3086	0.389021	0.29321	0.283294	0.276613	0.387524	0.171472	0.157426	0.136763	0.235489	0.337287	0.180655	0.2505	0.333199	0.235426	0.244777	ug/g
POS3516	Y	TG(18:0_16:0_18:0)+NH4	TG(52:0)+NH4	TG	(18:0_16:0_18:0)	(18:0)	(16:0)	(18:0)		C55 H110 O6 N1	880.833	17.2739	0.0791713	0.00748504	15.0886	13.06	24.6943	12.8367	21.7606	27.4019	13.8252	10.1914	15.6183	20.3448	25.5306	17.165	25.4705	21.2713	19.0416	9.54679	13.6498	11.5359	19.0635	13.6692	21.6311	25.5652	25.5765	21.7309	23.1346	ug/g
POS3616	Y	TG(16:0e_17:0_19:1)+Na	TG(52:1e)+Na	TG	(16:0e_17:0_19:1)	(16:0e)	(17:0)	(19:1)		C55 H106 O5 Na1	869.793	15.6667	0.0935761	0.000753068	2.4227	2.32401	3.18168	2.05746	1.4076	1.18988	0.574111	1.5283	3.38056	1.90858	3.14224	2.13683	3.05587	2.88859	3.18654	1.16569	1.22136	1.15646	1.77779	2.51423	3.35853	2.84454	2.73068	2.28959	2.53428	ug/g
POS3751	Y	TG(16:0_18:1_18:3)+NH4	TG(52:4)+NH4	TG	(16:0_18:1_18:3)	(16:0)	(18:1)	(18:3)		C55 H102 O6 N1	872.77	16.4909	0.0121197	0.0402953	88.1308	93.4946	113.749	123.923	164.665	101.45	101.311	101.51	108.319	139.056	112.105	145.426	104.754	90.8875	95.73	121.525	99.3634	117.392	122.031	137.172	133.418	120.805	122.377	118.895	120.037	ug/g
POS3771	Y	TG(14:0e_18:0_20:5)+Na	TG(52:5e)+Na	TG	(14:0e_18:0_20:5)	(14:0e)	(18:0)	(20:5)		C55 H98 O5 Na1	861.731	16.1919	0.0801901	0.0490259	0.056687	0.0260332	0.0560009	0.10629	0.00977097	0.0444361	0.0562771	0.0741632	0.139397	0.0591119	0.0790635	0.0969416	0.0135637	0.0377596	0.0393896	0.0349337	0.043652	0.052489	0.0321092	0.0541422	0.0650539	0.107148	0.100744	0.101138	0.0882008	ug/g
POS3772	Y	TG(16:1_18:2_18:3)+NH4	TG(52:6)+NH4	TG	(16:1_18:2_18:3)	(16:1)	(18:2)	(18:3)		C55 H98 O6 N1	868.739	15.8081	0.0971101	0.046986	1.28182	0.663618	1.65617	0.597101	1.77877	1.01034	1.2201	1.21998	0.779325	1.17674	1.48423	1.77069	0.974708	0.647988	0.412436	0.828824	1.23104	1.39847	1.04547	1.70957	1.18628	1.45662	1.52113	1.21096	1.3616	ug/g
POS3889	Y	TG(18:1_17:1_18:2)+NH4	TG(53:4)+NH4	TG	(18:1_17:1_18:2)	(18:1)	(17:1)	(18:2)		C56 H104 O6 N1	886.786	16.624	0.0109638	0.0281022	7.78471	7.47816	8.52583	9.73961	15.3428	6.62509	9.13312	8.75295	8.16573	9.3973	7.52477	9.64596	6.24212	7.05047	6.33488	8.2641	7.91712	9.8614	10.5654	8.60318	10.2619	8.50898	8.555	8.69612	8.6882	ug/g
POS3947	Y	TG(20:4e_14:4_19:1)+H	TG(53:9e)+H	TG	(20:4e_14:4_19:1)	(20:4e)	(14:4)	(19:1)		C56 H93 O5	845.702	9.945	0.77866	0.04815	0.0163762	0.0118928	0.0197418	0.00648229	0.0296805	0.0199497	0.119353	0.00353852	0.0118154	0.030767	0.0136497	0.0347269	0.0303384	0.0154768	0.0537345	0.00972889	0.00521571	0.0110459	0.0175257	0.0478733	0.0204978	0.0285149	0.0119366	0.0224056	0.000455099	ug/g
POS4081	Y	TG(20:0e_16:0_18:2)+Na	TG(54:2e)+Na	TG	(20:0e_16:0_18:2)	(20:0e)	(16:0)	(18:2)		C57 H108 O5 Na1	895.809	14.498	0.21638	0.0473738	0.161902	0.141326	0.0979054	0.077111	0.185258	0.15128	0.0801643	0.158379	0.216274	0.136652	0.0973786	0.071658	0.239542	0.298686	0.14187	0.135579	0.15149	0.173048	0.215885	0.216913	0.0265467	0.202206	0.119031	0.190309	0.189338	ug/g
POS4150	Y	TG(18:1_18:2_18:2)+H	TG(54:5)+H	TG	(18:1_18:2_18:2)	(18:1)	(18:2)	(18:2)		C57 H101 O6	881.759	12.787	0.444271	0.0337124	0.065884	0.00871699	0.0914208	0.0733583	0.162385	0.245756	0.108966	0.054515	0.119654	0.0860635	0.138795	0.186081	1.29929	0.137067	0.314649	0.0358454	0.0578541	0.0562646	0.0947264	0.629177	0.0868289	0.0957857	0.0812455	0.0277472	0.0607695	ug/g
POS4154	Y	TG(18:0_18:2_18:3)+NH4	TG(54:5)+NH4	TG	(18:0_18:2_18:3)	(18:0)	(18:2)	(18:3)		C57 H104 O6 N1	898.786	16.5324	0.0143956	0.0124298	19.6514	18.2243	37.7167	25.1146	46.0039	18.2246	20.599	19.69	12.5054	26.578	22.1872	30.6302	18.2331	18.1276	16.9198	25.2102	21.0987	22.9265	26.6411	31.7548	31.2568	24.1008	24.4736	23.6312	24.0022	ug/g
POS4167	Y	TG(18:1_18:2_18:3)+NH4	TG(54:6)+NH4	TG	(18:1_18:2_18:3)	(18:1)	(18:2)	(18:3)		C57 H102 O6 N1	896.77	16.2313	0.0515234	0.000684242	4.77843	3.04105	5.96713	4.38815	9.76293	3.42633	4.77682	4.07335	4.29483	5.36679	5.75466	7.07467	3.01684	3.31892	3.12077	5.14504	4.34337	5.03511	4.73309	8.55182	6.31676	5.26878	5.55357	5.0234	4.96613	ug/g
POS4224	Y	TG(19:1_14:4_22:5)+NH4	TG(55:10)+NH4	TG	(19:1_14:4_22:5)	(19:1)	(14:4)	(22:5)		C58 H96 O6 N1	902.723	16.286	0.119306	0.0247821	0.0181886	0.0446877	0.0747303	0.0374836	0.0417222	0.0357143	0.0330755	0.0285989	0.05121	0.0598298	0.0284876	0.114305	0.00739922	0.0218399	0.0137768	0.0678645	0.0403203	0.0497657	0.015527	0.05519	0.0160352	0.0229502	0.0236434	0.0283172	0.0217284	ug/g
POS4277	Y	TG(19:1_18:1_18:2)+NH4	TG(55:4)+NH4	TG	(19:1_18:1_18:2)	(19:1)	(18:1)	(18:2)		C58 H108 O6 N1	914.817	17.9662	0.127725	0.00460189	0.0280641	0.103681	0.0227076	0.0202518	0.0241669	0.0328604	0.0164345	0.0729743	0.180221	0.0214644	0.0587988	0.0864203	0.0068173	0.00685212	0.00330575	0.0446564	0.0515106	0.0237027	0.00743362	0.0260337	0.0179488	0.0813137	0.0651458	0.0634627	0.0632456	ug/g
POS4279	Y	TG(19:1_18:1_18:3)+NH4	TG(55:5)+NH4	TG	(19:1_18:1_18:3)	(19:1)	(18:1)	(18:3)		C58 H106 O6 N1	912.801	16.6495	0.00542085	0.0239425	0.314603	0.352767	0.394063	0.450961	0.744375	0.339177	0.403812	0.422066	0.391448	0.490924	0.33033	0.444732	0.262601	0.323286	0.27043	0.40836	0.395239	0.426373	0.540357	0.422746	0.009107	0.36716	0.368985	0.37149	0.371072	ug/g
POS4387	Y	TG(18:0e_19:0_19:1)+Na	TG(56:1e)+Na	TG	(18:0e_19:0_19:1)	(18:0e)	(19:0)	(19:1)		C59 H114 O5 Na1	925.856	16.5028	0.03623	0.0473768	0.850888	0.516517	0.617013	0.458508	0.628674	0.723219	0.321714	0.284976	0.692348	0.67981	0.68399	0.34358	0.865933	0.596888	0.91211	0.43061	0.336614	0.36539	0.888621	0.530573	0.663368	0.757748	0.71961	0.70261	0.702165	ug/g
POS4452	Y	TG(20:1_18:1_18:1)+NH4	TG(56:3)+NH4	TG	(20:1_18:1_18:1)	(20:1)	(18:1)	(18:1)		C59 H112 O6 N1	930.848	17.2881	0.0141982	0.0326514	11.7382	9.69839	11.3556	9.66485	15.8007	9.08858	6.0278	6.35932	4.3426	10.4471	8.4973	10.8338	8.391	4.95156	4.11092	10.8574	9.64422	9.53361	11.0056	12.2141	13.8775	9.35045	9.67064	9.44739	9.46448	ug/g
POS4510	Y	TG(18:3e_18:0_20:4)+Na	TG(56:7e)+Na	TG	(18:3e_18:0_20:4)	(18:3e)	(18:0)	(20:4)		C59 H102 O5 Na1	913.762	7.43965	0.370797	0.0424132	0.0114885	0.00544996	0.022667	0.00384361	0.0105178	0.00911756	0.0164014	0.00205732	0.00559356	0.00925737	0.00350818	0.00845575	0.0107879	0.00441116	0.00356964	0.000561732	0.00189908	0.0022714	0.00250205	0.00140129	0.00105993	0.0105678	0.00529591	0.00623453	0.00522709	ug/g
POS4606	Y	TG(18:3e_19:0_20:2)+Na	TG(57:5e)+Na	TG	(18:3e_19:0_20:2)	(18:3e)	(19:0)	(20:2)		C60 H108 O5 Na1	931.809	15.5445	0.0647328	0.00195644	0.30159	0.384636	0.318088	0.409708	0.405447	0.15006	0.200717	0.309455	0.286975	0.511975	0.399324	0.518877	0.16355	0.257404	0.162274	0.367757	0.348948	0.399701	0.422019	0.368109	0.108626	0.367606	0.354458	0.410068	0.367252	ug/g
POS4765	Y	TG(18:0_18:1_23:0)+NH4	TG(59:1)+NH4	TG	(18:0_18:1_23:0)	(18:0)	(18:1)	(23:0)		C62 H122 O6 N1	976.927	12.454	0.112179	0.0211977	0.0311108	0.0173962	0.00651262	0.0181045	0.0153178	0.00994314	0.0260425	0.00573752	0.0207021	0.0194564	0.0208583	0.0267818	0.0251274	0.0193973	0.032808	0.0161934	0.0123098	0.00989774	0.00804753	0.0209746	0.0129232	0.0140762	0.0135554	0.0117351	0.0111244	ug/g
POS4811	Y	TG(16:2e_21:1_22:5)+H	TG(59:8e)+H	TG	(16:2e_21:1_22:5)	(16:2e)	(21:1)	(22:5)		C62 H107 O5	931.811	15.55	0.0654103	0.0382966	0.302083	0.38406	0.321167	0.404018	0.657794	0.198165	0.199682	0.30815	0.286357	0.506119	0.306271	0.498239	0.162922	0.317666	0.16208	0.367073	0.348081	0.399278	0.420412	0.437419	0.108466	0.36719	0.354039	0.41013	0.366816	ug/g
POS4848	Y	TG(20:1_18:1_22:1)+NH4	TG(60:3)+NH4	TG	(20:1_18:1_22:1)	(20:1)	(18:1)	(22:1)		C63 H120 O6 N1	986.911	8.618	0.397342	0.0327674	0.0273754	0.00148645	0.00465659	0.0123078	0.0162089	0.0217305	0.020405	0.0144125	0.0191727	0.00453339	0.0115144	0.00368698	0.0246118	0.012105	0.0238114	0.00747519	0.00920066	0.00803252	0.00701639	0.00566148	0.00818975	0.00332414	0.0015922	0.00480649	0.00370664	ug/g
NEG147	Y	Cer(d43:2)+HCOO	Cer(d43:2)+HCOO	Cer	(d43:2)	(d43:2)				C44 H84 O5 N1	706.635	14.415	0.0521593	0.0490662	3.71534	0.746402	1.25077	2.59437	0.772066	0.625209	1.56691	1.09955	0.83064	0.632461	0.813492	0.734083	1.23137	0.890745	0.86831	0.781406	0.589117	0.619253	0.595067	0.783963	0.931924	0.955485	1.00199	0.985123	0.888642	ug/g
NEG407	Y	PC(16:1e_14:0)+HCOO	PC(30:1e)+HCOO	PC	(16:1e_14:0)	(16:1e)	(14:0)			C39 H77 O9 N1 P1	734.534	9.28017	0.649813	0.0468145	0.0426396	0.0311666	0.00334217	0.643037	0.239494	0.0835106	0.248488	0.159526	0.279579	0.285761	0.251479	0.359685	0.200294	0.193118	0.226642	0.203239	0.260039	0.195811	0.169434	0.547662	0.324609	0.143412	0.0791045	0.309587	0.105392	ug/g
NEG550	Y	PE(10:0_11:4)-H	PE(21:4)-H	PE	(10:0_11:4)	(10:0)	(11:4)			C26 H43 O8 N1 P1	528.273	1.80256	0.00367213	0.00756462	2.3117	2.00143	2.54694	4.3214	5.57326	3.76064	4.42114	4.06473	2.92912	3.78292	5.09204	5.10412	2.83283	1.61394	1.65701	2.54837	2.93874	2.55204	3.21547	3.75761	3.05282	6.09019	6.12319	6.07463	6.07699	ug/g
NEG558	Y	PE(16:1e_17:1)-H	PE(33:2e)-H	PE	(16:1e_17:1)	(16:1e)	(17:1)			C38 H73 O7 N1 P1	686.513	10.4699	0.0683985	0.0469352	1.42731	1.03679	0.904083	1.19784	0.792804	0.577932	0.782233	0.739977	0.50885	0.53912	0.799032	0.625566	0.901582	1.06543	1.16846	0.989115	0.723537	0.682258	0.555125	1.16963	1.85923	0.891433	0.76987	0.797512	0.781495	ug/g
NEG588	Y	PE(18:1e_18:2)-H	PE(36:3e)-H	PE	(18:1e_18:2)	(18:1e)	(18:2)			C41 H77 O7 N1 P1	726.544	11.732	0.073732	0.0407396	1.05577	0.807264	1.60288	0.857745	1.38541	3.24271	0.625723	0.786654	0.679901	0.867171	3.19104	1.12139	5.07617	4.31317	1.78853	0.92646	0.627044	0.86948	0.706877	3.69696	1.68766	0.783234	0.88503	0.761831	0.762128	ug/g
NEG696	Y	PI(27:0_12:3)-H	PI(39:3)-H	PI	(27:0_12:3)	(27:0)	(12:3)			C48 H86 O13 N0 P1	901.581	10.0758	0.0289501	0.00403039	4.99952	2.81213	2.84439	2.19964	2.55523	2.65641	3.23475	3.39868	3.87734	2.46142	1.96898	1.90871	4.03148	3.9501	4.37446	2.66633	3.07372	2.01637	1.91695	1.94552	2.19226	2.48846	2.44715	2.41784	2.58279	ug/g
NEG48	Y	CL(81:13)-2H	CL(81:13)-2H	CL	(81:13)	(81:13)				C90 H148 O17 P2	781.51	13.6981	0.0376077	0.0232413	0.435327	0.092216	0.139515	0.340793	0.269806	0.0610959	0.100248	0.0881883	0.0610882	0.0953268	0.0853002	0.0644921	0.159084	0.123649	0.182668	0.103054	0.123062	0.161084	0.0801089	0.249634	0.397258	0.184876	0.188962	0.177804	0.194456	ug/g
NEG52	Y	CL(82:8)-2H	CL(82:8)-2H	CL	(82:8)	(82:8)				C91 H160 O17 P2	793.557	14.6745	0.010619	0.00752479	0.198544	0.0813348	0.0763473	0.43285	0.128026	0.0993704	0.120767	0.0825576	0.125355	0.0797778	0.100143	0.116293	0.11918	0.12306	0.148649	0.0405375	0.072805	0.0575683	0.0332897	0.218879	0.158829	0.142489	0.142595	0.145754	0.143273	ug/g
NEG53	Y	CL(85:1)-2H	CL(85:1)-2H	CL	(85:1)	(85:1)				C94 H180 O17 P2	821.635	12.3819	0.0422589	0.0320036	1.73108	1.55554	1.51823	1.89628	2.00659	1.87564	1.90642	1.7634	1.68804	1.79155	1.58629	2.11539	2.45858	1.9189	2.14983	1.63314	1.53918	1.3153	1.27617	2.05835	1.69052	1.90209	1.88048	1.73023	1.86852	ug/g
NEG210	Y	Cer(t18:0_22:1)+HCOO	Cer(t40:1)+HCOO	Cer	(t18:0_22:1)	(t18:0)	(22:1)			C41 H80 O6 N1	682.599	11.976	0.106685	0.0170207	0.0110145	0.202805	0.0422498	0.544542	0.267335	0.157094	0.184851	0.167844	0.160991	0.099724	0.100194	0.150741	0.218795	0.170343	0.227586	0.205683	0.168565	0.243055	0.180184	0.215393	0.346118	0.302348	0.262505	0.341528	0.307682	ug/g
NEG203	Y	Cer(t35:2)+HCOO	Cer(t35:2)+HCOO	Cer	(t35:2)	(t35:2)				C36 H68 O6 N1	610.505	10.1994	0.143341	0.0238856	0.765474	0.416148	0.233078	1.19827	0.481158	0.159484	0.221608	0.204087	0.175001	0.167416	0.118751	0.220865	0.345014	0.309517	0.371193	0.224372	0.31376	0.196386	0.221552	0.56976	0.886209	0.445122	0.556213	0.419261	0.416763	ug/g
NEG252	Y	CerP(t39:3)-H	CerP(t39:3)-H	CerP	(t39:3)	(t39:3)				C39 H73 O7 N1 P1	698.513	12.7394	0.0337974	0.0423436	1.92995	0.98096	0.839492	2.42271	1.11819	1.43734	0.818662	0.572107	0.79691	0.996595	0.755136	0.997833	1.10385	1.13918	1.356	0.936079	0.850638	0.701769	0.452369	1.73338	1.51157	1.11643	1.19405	1.19043	1.13505	ug/g
NEG375	Y	OAHFA(31:1)-H	OAHFA(31:1)-H	OAHFA	(31:1)	(31:1)				C31 H57 O4	493.426	8.712	0.206081	0.0192765	0.0950603	1.45442	0.508424	0.225993	0.0714493	0.153527	0.704242	0.942159	1.40911	0.264095	0.2641	0.149548	0.490562	0.878135	0.639632	0.66018	1.13221	0.410058	0.709507	0.364274	0.203361	3.9189	2.5994	3.22039	2.57671	ug/g
NEG390	Y	PA(49:1)-H	PA(49:1)-H	PA	(49:1)	(49:1)				C52 H100 O8 N0 P1	883.716	16.1737	0.181565	0.0239519	0.451478	0.596038	0.519219	0.467479	1.05981	0.617634	0.741895	0.578148	0.674875	0.687781	0.688679	0.90891	0.444048	0.468077	0.55907	0.505302	0.662987	0.579416	0.556701	0.68101	0.969385	0.633865	0.457683	0.45402	0.447625	ug/g
NEG539	Y	PC(51:5)-CH3	PC(51:5)-CH3	PC	(51:5)	(51:5)				C58 H105 O8 N1 P1	974.758	14.4191	0.112452	0.0309588	0.0206751	0.0124741	0.02267	0.0825934	0.0694196	0.0446696	0.137484	0.160901	0.150966	0.103074	0.138892	0.164031	0.0774065	0.110809	0.0397566	0.0327109	0.0413703	0.0616186	0.0559987	0.112277	0.0371393	0.281446	0.294897	0.225391	0.270618	ug/g
NEG545	Y	PC(53:5)-CH3	PC(53:5)-CH3	PC	(53:5)	(53:5)				C60 H109 O8 N1 P1	1002.79	15.0883	0.0669243	0.00675008	0.0097445	0.0108134	0.0312802	0.0460319	0.0348829	0.0418774	0.0317684	0.103847	0.0898583	0.0714596	0.0655618	0.0654651	0.0306356	0.036951	0.0175572	0.0240486	0.00876211	0.0153251	0.0750976	0.0256608	0.0119354	0.159918	0.137216	0.155008	0.156582	ug/g
NEG653	Y	PE(56:5)-H	PE(56:5)-H	PE	(56:5)	(56:5)				C61 H111 O8 N1 P1	1016.81	15.4255	0.0229125	0.0380322	0.0759602	0.027003	0.181427	0.182324	0.126769	0.144063	0.323216	0.176173	0.428001	0.202739	0.226528	0.325391	0.189049	0.215953	0.0946589	0.0877401	0.0813024	0.131388	0.158501	0.0593996	0.050172	0.429031	0.44451	0.426582	0.445537	ug/g
NEG577	Y	PE(17:1_18:2)-H	PE(35:3)-H	PE	(17:1_18:2)	(17:1)	(18:2)			C40 H73 O8 N1 P1	726.508	8.7844	0.106841	0.0293422	0.306289	0.22076	0.235263	0.299199	0.517206	0.162412	0.181875	0.226697	0.0674265	0.133502	0.195348	0.225278	0.400075	0.340391	0.274874	0.254743	0.258683	0.342067	0.1998	0.369946	0.503289	0.432688	0.41265	0.380165	0.489231	ug/g
NEG621	Y	PE(17:1_22:2)-H	PE(39:3)-H	PE	(17:1_22:2)	(17:1)	(22:2)			C44 H81 O8 N1 P1	782.571	11.6715	0.0251948	0.000791363	1.05271	0.491512	0.40707	0.960469	0.595157	0.567702	0.494509	0.651504	0.508387	0.318197	0.253873	0.26617	0.548609	0.531558	0.64801	0.343865	0.427433	0.346842	0.272883	0.36555	0.541808	0.530634	0.528128	0.507694	0.53892	ug/g
NEG677	Y	PI(17:0_18:1)-H	PI(35:1)-H	PI	(17:0_18:1)	(17:0)	(18:1)			C44 H82 O13 N0 P1	849.55	9.46315	0.0213526	0.009473	1.6182	2.13394	0.895576	1.02902	1.41066	0.938196	2.06416	1.30026	0.669415	1.26343	1.32717	1.47982	1.35367	1.31577	1.58551	2.20593	1.75555	1.86938	1.18536	1.62721	2.15188	1.46365	1.49111	1.52927	1.46102	ug/g
NEG687	Y	PI(17:0_20:3)-H	PI(37:3)-H	PI	(17:0_20:3)	(17:0)	(20:3)			C46 H82 O13 N0 P1	873.55	9.2422	0.0149385	0.0313228	6.01062	5.40322	3.22335	4.76413	4.44859	4.4463	5.64015	5.52232	4.58144	4.05799	3.40744	3.07892	4.09024	4.66175	5.01332	4.34834	4.50985	4.51591	3.12087	3.71182	3.65186	3.80364	3.84116	3.78197	3.91253	ug/g
NEG688	Y	PI(17:0_20:4)-H	PI(37:4)-H	PI	(17:0_20:4)	(17:0)	(20:4)			C46 H80 O13 N0 P1	871.534	8.43353	0.0457027	0.0406358	1.74276	1.42425	1.1804	1.77212	2.75007	1.6346	2.21639	2.24216	1.53119	1.6208	1.93987	1.91424	1.05326	1.4858	1.27266	1.8664	1.97478	1.46493	1.47556	2.81783	2.22294	1.80219	1.91609	1.72711	1.76062	ug/g
